# Supplementary material for: The plastid-localized pfkB-type carbohydrate kinases FRUCTOKINASE-LIKE 1 and 2 are essential for growth and development of Arabidopsis thaliana
Source: PubMed Central journal article supplement (PMC3409070; doi:10.1186/1471-2229-12-102), 2012-07-08
Supplement: 1471-2229-12-102-S1.pdf [file 1471-2229-12-102-S1.pdf]

*fln1-1*

5' TCAAAAACCC---TGATGAGCAATTATATTC AATTGTAA---ATGGCTTCA--L T-DNA R----- 3'

*fln2-1*

*fln2-3*

5' TGTGGAGGAT---L T-DNAR RL T-DNALGATAAAGATGTGGAGGA---GATTTAGCTA 3'

*fln2-2*

5' ----R T-DNA L-----TTTATGGGC 3'
